# Supplementary material for: Resveratrol Prevents Diabetic Cardiomyopathy by Increasing Nrf2 Expression and Transcriptional Activity
Source: Biomed Res Int. 2018 Mar 12;2018:2150218. doi: 10.1155/2018/2150218 (PMC5867593; doi:10.1155/2018/2150218)
Supplement: Supplementary Materials — Resveratrol prevention of diabetes-induced myocardial injury. Photomicrographs of histological hematoxylin-eosin. [file 2150218.f1.zip]

Archive with 2 entries (2 files):
- Supplemental figure .pptx
- supplementary figure.tif
